# Supplementary material for: A polymer monolith for hydrophilic and dynamically surfactant-modified reversed-phase capillary electrochromatography
Source: Royal Society of Chemistry journal article supplement (doi:10.1039/c3ra43377c), 2013-01-01
Supplement: c3ra43377c.pdf [file c3ra43377c.pdf]

## Electronic Supporting Information

### **A polymer monolith for hydrophilic and dynamically surfactant-modified reversed-phase capillary electrochromatography**

**Xucong Lin,<sup>\*a</sup> Wencao Jia<sup>a</sup>, Shuhui Feng<sup>a</sup>, Jia Lin<sup>a</sup>, and Zenghong Xie<sup>a,b</sup>**

<sup>a</sup> *Institute of food safety and environmental monitoring, Fuzhou University, 350108,  
China.*

<sup>b</sup> Xiamen Huaxia Vocational College, Xiamen, 361024, China.

\* Corresponding author: Xucong Lin

E-mail: xulin@fzu.edu.cn

Fax: +86-591-22866131; Tel: +86-591-22866131;

## Supporting Figures

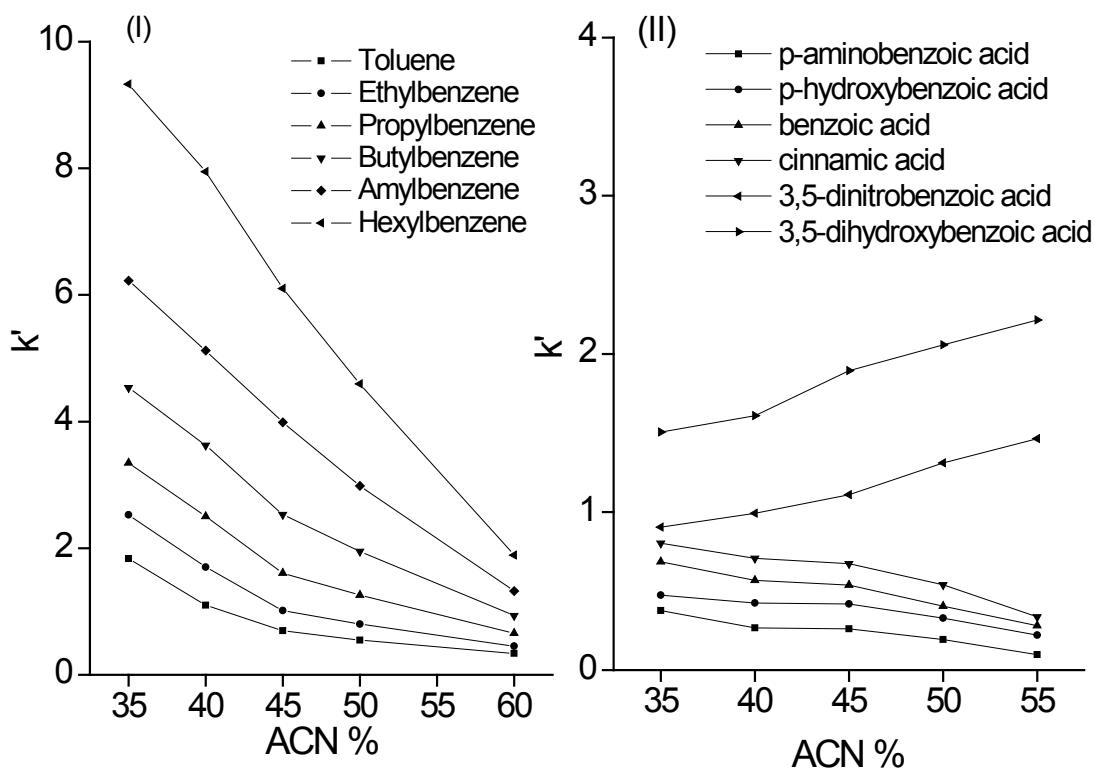

**Fig.S1** Effects of ACN on  $k'$  of alkyl benzenes (I) and aromatic acids (II)

Condition: mobile phase: (I) 100mM SDS and buffer (pH 3.0, 20mM) were 7% and 3%, ACN and water was 90%. (II) 100mM SDS and buffer (pH 3.0, 20mM) were 10% and 9%, ACN and water was 81%. Other conditions as for Fig.4.

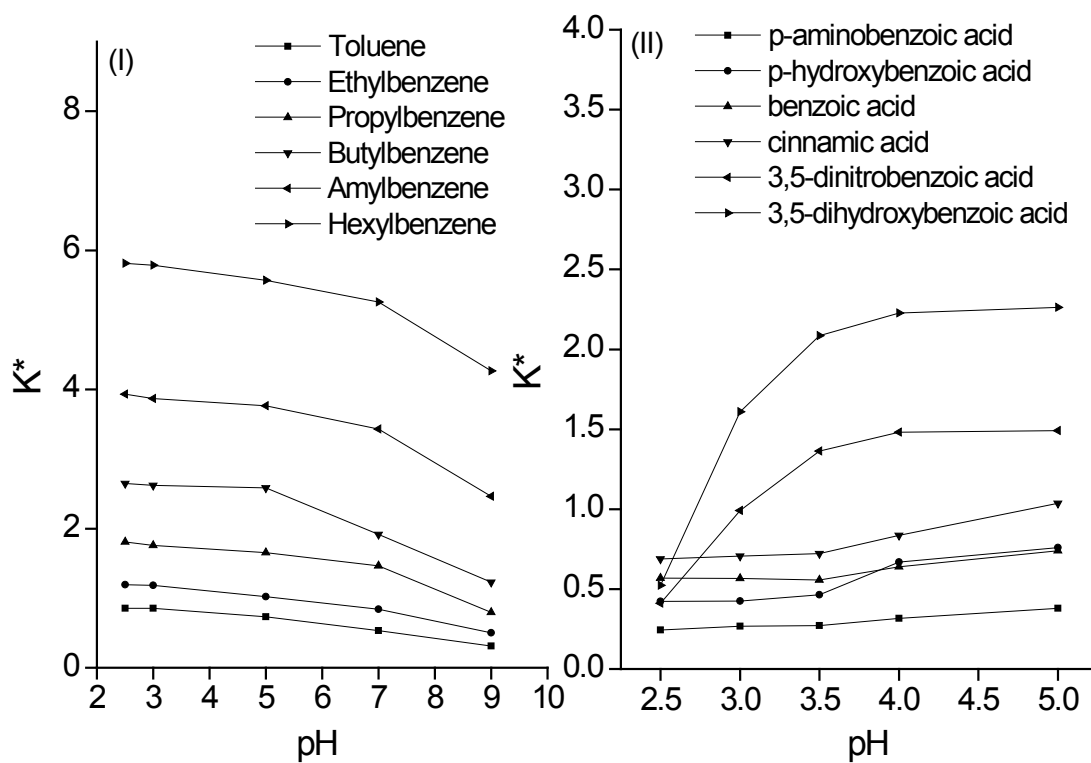

**Fig.S2** Effects of pH on  $k'$  of alkyl benzenes (I) and aromatic acids (II)

Condition: mobile phase: (I) ACN/.100mM SDS/20mM buffer/water = 50/7/3/40. (II) ACN/100mM SDS/20mM buffer/water = 40/10/9/41. Other conditions as for Fig.4.
